# Supplementary material for: Factors influencing readthrough therapy for frequent cystic fibrosis premature termination codons
Source: PubMed Central journal article supplement — ERJ Open Res. 2018 Feb 23;4(1):00080-2017. doi: 10.1183/23120541.00080-2017 (PMC5827411; doi:10.1183/23120541.00080-2017), 2018-02-23
Supplement: 00080-2017_supp.pdf [file 00080-2017_supp.pdf]

## **Supporting information**

**S1 Table. Selected mutations and sequences inserted in the dual reporter plasmid**

**S2 Table. Basal and drug induced readthrough levels.**

**S3 Table. PTC associated exon skipping.**

**S4 Table. Major and minor amino acid identified by mass spectrometry in the absence and presence of paromomycin.**

**S5 Table. Predicted recoded CFTR channels.**

**S6 Table. Maturation of recoded CFTR channels.**

**S7 Table. Function of recoded CFTR channels.**

**S8 Table. Predicted readthrough response to negamycin**

**S9 Table. Mismatches leading to amino acid mis-incorporation.**

**S10 Table. Primer sequences used to generate minigene constructs**

**S1 Figure. Readthrough levels.**

**S2 Fig. Multiple transcripts produced with the constructs carrying CFTR exon 14 and exon 22.**

**S3 Fig. MS/MS spectra of the readthrough peptides in presence of paromomycin.**

**S4 Fig. Correlation between CFTR maturation and function.**

**S5 Fig. Classified readthrough response to gentamicin and negamycin.**

**S1 Table. Selected mutations and sequences inserted in the dual reporter plasmid.** Are indicated the inserted sequences corresponding to the indicated PTC.

| Mutation  |                          |                                    | Mutation  |                           |                                    |
|-----------|--------------------------|------------------------------------|-----------|---------------------------|------------------------------------|
| Mutation  |                          | Inserted sequence                  | Mutation  |                           | Inserted sequence                  |
| c.178G>T  | p.Glu60*                 | TGG GAT AGA <b>TAG</b> CTG GCT TCA | c.2537G>A | p.Trp846* <sub>UAG</sub>  | GTG ACT ACA <b>TAG</b> AAC ACA TAC |
| c.366T>A  | p.Tyr122*                | TCT ATC GCG <b>TAA</b> CTA GGC ATA | c.2538G>A | p.Trp846* <sub>UGA</sub>  | GTG ACT ACA <b>TGA</b> AAC ACA TAC |
| c.658C>T  | p.Gln220*                | GAG TTG TTA <b>TAG</b> GCG TCT GCC | c.2551C>T | p.Arg851*                 | ACA TAC CTT <b>TGA</b> TAT ATT ACT |
| c.825C>G  | p.Tyr275*                | GTT AAG GCA <b>TAG</b> TGC TGG GAA | c.3276C>A | p.Tyr1092* <sub>UAA</sub> | TGG TTC TTG <b>TAA</b> CTG TCA ACA |
| c.868C>T  | p.Gln290*                | AAC TTA AGA <b>TAA</b> ACA GAA CTC | c.3310G>T | p.Glu1104*                | ATG AGA ATA <b>TAA</b> ATG ATT TTT |
| c.1301C>G | p.Ser434*                | AGT AAT TTC <b>TGA</b> CTT CTT GGT | c.3382A>T | p.Arg1128*                | GGA GAA GGA <b>TGA</b> GTT GGT ATT |
| c.1397C>G | p.Ser466* <sub>UGA</sub> | GGC AAG ACT <b>TGA</b> CTT CTA ATG | c.3472C>T | p.Arg1158*                | AGC TTG ATG <b>TGA</b> TCT GTG AGC |
| c.1624G>T | p.Glu542*                | TTG CAA CAG <b>TGA</b> AGG AAA GCC | c.3484C>T | p.Arg1162*                | TCT GTG AGC <b>TGA</b> GTC TTT AAG |
| c.1657C>T | p.Arg553*                | GGA GGT CAA <b>TGA</b> GCA AGA ATT | c.3587C>G | p.Ser1196*                | ATT GAG AAT <b>TGA</b> CAC GTG AAG |
| c.1753G>T | p.Glu585*                | ACA GAA AAA <b>TAA</b> ATA TTT GAA | c.3802C>T | p.Gln1268*                | GGA GAA ATC <b>TAG</b> ATC GAT GGT |
| c.2125C>T | p.Arg709*                | AAC TCT ATA <b>TGA</b> AAA TTT TCC | c.3846G>A | p.Trp1282*                | ATA GTT CTT <b>TGA</b> GAA GGT GGA |
| c.2128A>T | p.Lys710*                | TCT ATA CGA <b>TAA</b> AAA ACC ATT | c.3937C>T | p.Gln1313*                | TGG AGT GAT <b>TAA</b> GAA ATA TGG |
| c.2299C>T | p.Gln767*                | CGA AGG AGG <b>TAG</b> TCT GTC CTG | c.4168C>T | p.Gln1390*                | ACT CTA AAA <b>TAA</b> GCA TTT GCT |
| c.2353C>T | p.Arg785*                | AAC ATT CAC <b>TGA</b> AAG ACA ACA | c.4252G>T | p.Glu1418*                | TTG GTC ATA <b>TAA</b> GAG AAC AAA |
| c.2491G>T | p.Glu831*                | GAC TTA AAG <b>TAG</b> TGC TTT TTT |           |                           |                                    |

**S2 Table. Basal and drug induced readthrough levels.** Values represent the median of n independent experiments. p-values are calculated using an unpaired Student t-test with  $\alpha = 0.01$ .

| Mutation                 | Basal (%)   | n  | Gentamicin (%) | n | p Value          | Negamycin (%) | n | P-value          |
|--------------------------|-------------|----|----------------|---|------------------|---------------|---|------------------|
| p.Glu60*                 | 0.06 ± 0.02 | 11 | 0.47 ± 0.16    | 5 | 10 <sup>-2</sup> | 0.13 ± 0.01   | 5 | 10 <sup>-4</sup> |
| p.Tyr122*                | 0.39 ± 0.19 | 12 | 1.85 ± 0.39    | 8 | 10 <sup>-5</sup> | 0.32 ± 0.04   | 5 | ns               |
| p.Gln220*                | 0.04 ± 0.01 | 12 | 0.33 ± 0.11    | 6 | 10 <sup>-3</sup> | 0.08 ± 0.01   | 6 | 10 <sup>-7</sup> |
| p.Tyr275*                | 0.03 ± 0.01 | 12 | 0.39 ± 0.15    | 6 | 10 <sup>-2</sup> | 0.11 ± 0.05   | 6 | 10 <sup>-2</sup> |
| p.Gln290*                | 0.04 ± 0.01 | 12 | 0.08 ± 0.01    | 6 | 10 <sup>-7</sup> | 0.03 ± 0.01   | 6 | ns               |
| p.Ser434*                | 0.34 ± 0.14 | 12 | 1.07 ± 0.19    | 6 | 10 <sup>-4</sup> | 5.55 ± 1.35   | 9 | 10 <sup>-5</sup> |
| p.Ser466*                | 0.52 ± 0.08 | 12 | 2.47 ± 0.56    | 5 | 10 <sup>-3</sup> | 1.72 ± 0.27   | 6 | 10 <sup>-4</sup> |
| p.Gly542*                | 0.08 ± 0.02 | 9  | 0.86 ± 0.63    | 6 | 10 <sup>-2</sup> | 0.05 ± 0.03   | 6 | ns               |
| p.Arg553*                | 0.07 ± 0.02 | 12 | 0.51 ± 0.22    | 6 | 10 <sup>-2</sup> | 0.12 ± 0.04   | 6 | ns               |
| p.Glu585*                | 0.04 ± 0.01 | 9  | 0.25 ± 0.04    | 6 | 10 <sup>-4</sup> | 0.09 ± 0.09   | 5 | ns               |
| p.Arg709*                | 0.04 ± 0.01 | 12 | 0.20 ± 0.04    | 6 | 10 <sup>-4</sup> | 0.34 ± 0.05   | 6 | 10 <sup>-4</sup> |
| p.Lys710*                | 0.03 ± 0.02 | 12 | 0.08 ± 0.06    | 5 | ns               | 0.05 ± 0.02   | 6 | ns               |
| p.Gln767*                | 0.02 ± 0.01 | 12 | 0.12 ± 0.06    | 6 | 10 <sup>-2</sup> | 0.03 ± 0.03   | 6 | ns               |
| p.Arg785*                | 0.06 ± 0.02 | 12 | 0.41 ± 0.35    | 6 | 10 <sup>-4</sup> | 0.42 ± 0.12   | 6 | 10 <sup>-3</sup> |
| p.Glu831*                | 0.05 ± 0.02 | 12 | 0.21 ± 0.25    | 6 | ns               | 0.02 ± 0.01   | 6 | ns               |
| p.Trp846* <sub>UAG</sub> | 0.03 ± 0.02 | 12 | 0.34 ± 0.10    | 6 | 10 <sup>-3</sup> | 0.26 ± 0.04   | 6 | 10 <sup>-4</sup> |
| p.Trp846* <sub>UGA</sub> | 0.35 ± 0.19 | 12 | 2.70 ± 0.76    | 5 | 10 <sup>-3</sup> | 1.54 ± 0.31   | 6 | 10 <sup>-4</sup> |
| p.Arg851*                | 0.05 ± 0.02 | 12 | 0.70 ± 0.17    | 6 | 10 <sup>-3</sup> | 0.12 ± 0.09   | 6 | 10 <sup>-3</sup> |
| p.Tyr1092*               | 0.04 ± 0.02 | 9  | 0.14 ± 0.04    | 6 | 10 <sup>-3</sup> | 0.06 ± 0.04   | 5 | ns               |
| p.Glu1104*               | 0.09 ± 0.02 | 8  | 0.16 ± 0.04    | 6 | 10 <sup>-2</sup> | 0.35 ± 0.03   | 6 | 10 <sup>-6</sup> |
| p.Arg1128*               | 0.22 ± 0.02 | 6  | 1.02 ± 0.27    | 6 | 10 <sup>-3</sup> | 0.52 ± 0.16   | 6 | 10 <sup>-2</sup> |
| p.Arg1158*               | 0.03 ± 0.01 | 12 | 0.05 ± 0.01    | 6 | ns               | 0.17 ± 0.04   | 6 | 10 <sup>-3</sup> |
| p.Arg1162*               | 0.04 ± 0.01 | 9  | 0.39 ± 0.15    | 6 | 10 <sup>-2</sup> | 0.07 ± 0.02   | 9 | 10 <sup>-2</sup> |
| p.Ser1196*               | 0.03 ± 0.01 | 7  | 2.53 ± 0.83    | 6 | 10 <sup>-3</sup> | 0.19 ± 0.05   | 9 | 10 <sup>-3</sup> |
| p.Gln1268*               | 0.05 ± 0.02 | 12 | 0.46 ± 0.05    | 9 | 10 <sup>-6</sup> | 0.67 ± 0.31   | 6 | 10 <sup>-2</sup> |
| p.Trp1282*               | 0.13 ± 0.02 | 12 | 0.74 ± 0.12    | 6 | 10 <sup>-4</sup> | 0.40 ± 0.34   | 6 | ns               |
| p.Gln1313*               | 0.03 ± 0.03 | 12 | 0.41 ± 0.17    | 6 | 10 <sup>-2</sup> | 0.06 ± 0.01   | 6 | 10 <sup>-2</sup> |
| p.Gln1390*               | 0.13 ± 0.02 | 12 | 0.15 ± 0.04    | 6 | ns               | 0.15 ± 0.06   | 6 | ns               |
| p.Glu1418*               | 0.02 ± 0.01 | 12 | 0.48 ± 0.11    | 6 | 10 <sup>-3</sup> | 0.02 ± 0.01   | 6 | ns               |

**S3 Table. PTC associated exon skipping.** Values represent the mean of n independent experiments. p-values are calculated using an unpaired Student t-test.

| Exon | Name      | Protein                   | Basal skipping (WT) | n= | Skipping (Mutation) | n= | P-value            |
|------|-----------|---------------------------|---------------------|----|---------------------|----|--------------------|
| 3    | c.178G>T  | p.Glu60*                  | 8 ± 3.2             | 7  | 32 ± 1.6            | 3  | < 0.001            |
| 4    | c.366T>A  | p.Tyr122*                 | 1 ± 0.5             | 6  | 2 ± 0.6             | 3  | ns                 |
| 10   | c.1301C>G | p.Ser434*                 | 2.5 ± 0.5           | 6  | 3.3 ± 0.3           | 6  | ns                 |
| 11   | c.1397C>G | p.Ser466* <sub>UGA</sub>  | 0                   | 7  | 0                   | 4  | ns                 |
| 12   | c.1624G>T | p.Gly542*                 | 0.3 ± 0.3           | 4  | 0.7 ± 0.1           | 4  | ns                 |
| 12   | c.1657C>T | p.Arg553*                 | 0.3 ± 0.3           | 4  | 6 ± 1.8             | 4  | < 0.001            |
| 14   | c.2353C>T | p.Arg785*                 | 8 ± 2.0             | 8  | 44 ± 11.4           | 14 | < 10 <sup>-6</sup> |
| 15   | c.2538G>A | p.Trp846* <sub>UGA</sub>  | 3 ± 0.7             | 9  | 12 ± 2.6            | 5  | < 0.001            |
| 20   | c.3276C>A | p.Tyr1092* <sub>UAA</sub> | 3 ± 0.3             | 3  | 2 ± 1.3             | 3  | ns                 |
| 20   | c.3310G>T | p.Glu1104*                | 3 ± 0.3             | 3  | 1 ± 2.0             | 3  | ns                 |
| 21   | c.3382A>T | p.Arg1128*                | 0                   | 4  | 0                   | 4  | ns                 |
| 22   | c.3484C>T | p.Arg1162*                | 0                   | 8  | 0                   | 4  | ns                 |
| 22   | c.3587C>G | p.Ser1196*                | 0                   | 8  | 0                   | 5  | ns                 |
| 23   | c.3846G>A | p.Trp1282*                | 0                   | 4  | 0                   | 3  | ns                 |
| 24   | c.3937C>T | p.Gln1313*                | 0                   | 6  | 0                   | 4  | ns                 |

**S4 Table. Major and minor amino acid identified by mass spectrometry in the absence and presence of paromomycin.**

| <b>PTC</b> | <b>- paromomycin</b> |           | <b>+ paromomycin</b> |           |
|------------|----------------------|-----------|----------------------|-----------|
|            | Major                | Minor     | Major                | Minor     |
| <b>UAA</b> | Gln & Tyr            | Lys       | Gln & Tyr            | Lys       |
| <b>UAG</b> | Tyr                  | Lys & Gln | Tyr                  | Lys & Gln |
| <b>UGA</b> | Trp                  | Arg & Cys | Trp                  | Arg & Cys |

**S5 Table. Predicted Recoded CFTR channels.** Are indicated the predicted recoded channels for the corresponding PTCs according to Blanchet et al (Gentamycin induced readthrough in the Yeast model). In bold are indicated the major recoded amino acids. <sup>CF</sup> indicates a known CF mutation, and <sup>WT</sup> indicates WT channels.

| Mutation          | PTC | Recoded Residue                                                               | CFTR variants               | Tested CFTR variants      |
|-------------------|-----|-------------------------------------------------------------------------------|-----------------------------|---------------------------|
| <b>p.Glu60*</b>   | UAG | <b>p.Glu60Tyr</b> ,<br>-Gln, -Lys <sup>CF</sup>                               | p.Glu60Lys                  | p.Glu60Tyr                |
| <b>p.Tyr122*</b>  | UAA | <b>p.Tyr122Gln</b><br><b>-Tyr<sup>WT</sup></b> , -Lys                         | p.Tyr122His<br>-Cys         | p.Tyr122Gln<br>-Lys       |
| <b>p.Ser434*</b>  | UGA | <b>p.Ser434Trp</b> ,<br>-Cys, -Arg                                            | -                           | p.Ser434Trp               |
| <b>p.Ser466*</b>  | UGA | <b>p.Ser466Trp</b> ,<br>-Cys, -Arg                                            | p.Ser466Leu                 | p.Ser466Trp               |
| <b>p.Gly542*</b>  | UGA | <b>p.Gly542Trp</b><br>-Cys, -Arg                                              | p.Gly542Glu                 | p.Gly542Trp<br>-Arg, -Cys |
| <b>p.Arg553*</b>  | UGA | <b>p.Arg553Trp</b> ,<br>-Cys, -Arg <sup>WT</sup>                              | p.Arg553Gly,<br>-Gln        | p.Arg553Trp               |
| <b>p.Arg785*</b>  | UGA | <b>p.Arg785Trp</b> ,<br>-Cys, -Arg <sup>WT</sup>                              | -                           | p.Arg785Trp               |
| <b>p.Trp846*</b>  | UGA | <b>p.Trp846Trp<sup>WT</sup></b> ,<br>-Cys, -Arg                               | -                           | -                         |
| <b>p.Tyr1092*</b> | UAA | <b>p.Tyr1092Gln, -Tyr<sup>WT</sup></b> ,<br>-Lys                              | p.Tyr1092Cys,<br>-His       | p.Tyr1092Gln              |
| <b>p.Glu1104*</b> | UAA | <b>p.Glu1104Gln, -Tyr</b><br>-Lys <sup>CF</sup>                               | p.Glu1104Lys                | p.Glu1104Gln<br>-Tyr      |
| <b>p.Arg1128*</b> | UGA | <b>p.Arg1128Trp</b> ,<br>-Cys, -Arg <sup>WT</sup>                             | -                           | p.Arg1128Trp              |
| <b>p.Arg1162*</b> | UGA | <b>p.Arg1162Trp</b> ,<br>-Cys, -Arg <sup>WT</sup>                             | p.Arg1162Leu                | p.Arg1162Trp              |
| <b>p.Ser1196*</b> | UGA | <b>p.Ser1196Trp</b> ,<br>-Cys, -Arg                                           | -                           | p.Ser1196Trp              |
| <b>p.Trp1282*</b> | UGA | <b>p.Trp1282Trp<sup>WT</sup></b> ,<br>-Cys <sup>CF</sup> , -Arg <sup>CF</sup> | p.Trp1282Gly<br>-Cys, -Arg, | -                         |
| <b>p.Gln1313*</b> | UAA | <b>p.Gln1313Gln<sup>WT</sup></b><br><b>-Tyr</b> , -Lys                        | p.Gln1313Lys                | p.Gln1313Tyr              |

**S6 Table. Maturation of recoded CFTR channels.** CFTR maturation was assessed using the C/(B+C) ratio for each condition. Are indicated significant differences to WT maturation ratio under control conditions (ANOVA followed with Fisher test for p value calculation) and significant differences between untreated and treated with VX809 constructs (unpaired Student t-test).

|                     | C/(B+C)  | n = | P-value           | % to basal WT | VX809    | n = | P-value           | % to basal WT |
|---------------------|----------|-----|-------------------|---------------|----------|-----|-------------------|---------------|
| <b>WT</b>           | 91 ± 1.5 | 10  |                   | 100%          |          |     |                   |               |
| <b>p.Phe508del</b>  | 19 ± 1.4 | 9   | <10 <sup>-4</sup> | 21%           | 47 ± 2.8 | 7   | <10 <sup>-4</sup> | 52%           |
| <b>p.Glu60Tyr</b>   | 19 ± 2.9 | 7   | <10 <sup>-4</sup> | 21%           | 73 ± 7.4 | 4   | <10 <sup>-4</sup> | 80%           |
| <b>p.Tyr122Lys</b>  | 92 ± 2.3 | 4   | ns                | -             |          |     |                   |               |
| <b>p.Tyr122Gln</b>  | 92 ± 2.5 | 4   | ns                | -             |          |     |                   |               |
| <b>p.Ser434Trp</b>  | 88 ± 1.7 | 4   | ns                | -             |          |     |                   |               |
| <b>p.Ser466Trp</b>  | 30 ± 3.4 | 6   | <10 <sup>-4</sup> | 33%           | 68 ± 3.5 | 4   | <10 <sup>-4</sup> | 75%           |
| <b>p.Gly542Trp</b>  | 48 ± 3.7 | 7   | <10 <sup>-4</sup> | 53%           | 63 ± 4.3 | 5   | 0.01              | 69%           |
| <b>p.Gly542R</b>    | 87 ± 3.7 | 6   | ns                | -             |          |     |                   |               |
| <b>p.Gly542C</b>    | 88 ± 1.2 | 6   | ns                | -             |          |     |                   |               |
| <b>p.Arg553Trp</b>  | 56 ± 4.0 | 6   | 10 <sup>-3</sup>  | 61%           | 74 ± 1.6 | 5   | <10 <sup>-2</sup> | 81%           |
| <b>p.Arg785Trp</b>  | 92 ± 2.2 | 4   | ns                | -             |          |     |                   |               |
| <b>p.Glu1104Y</b>   | 51 ± 6.7 | 6   | <10 <sup>-4</sup> | 56%           | 75 ± 3.7 | 4   | 0.02              | 82%           |
| <b>p.Glu1104Q</b>   | 85 ± 2.7 | 4   | ns                | 93%           |          |     |                   |               |
| <b>p.Tyr1092Q</b>   | 94 ± 1.3 | 4   | ns                | -             |          |     |                   |               |
| <b>p.Arg1128Trp</b> | 90 ± 2.3 | 4   | ns                | -             |          |     |                   |               |
| <b>p.Arg1162Trp</b> | 90 ± 1.5 | 4   | ns                | -             |          |     |                   |               |
| <b>p.Ser1196Trp</b> | 93 ± 0.6 | 4   | ns                | -             |          |     |                   |               |
| <b>p.Gln1313Y</b>   | 90 ± 1.9 | 4   | ns                | -             |          |     |                   |               |

**S7 Table. Function of recoded CFTR channels.** CFTR function was measured as the initial transport rate for each condition. Are indicated differences to WT transport rates under control conditions, (ANOVA followed with Fisher test for p value calculation). Differences between untreated constructs and constructs treated with VX770 or VX809/VX770 were evaluated using Student unpaired t-test.

| Construct    | Transport rate (mM/s) Basal | <i>n</i> | WT <i>P</i> -value | % to control WT | Transport rate (mM/s) VX770 | <i>n</i> | Effect of VX770 <i>P</i> -value | % to control WT | Transport rate (mM/s) VX809+VX770 | <i>n</i> | Effect of VX809+VX770 <i>P</i> -value | % to control WT |
|--------------|-----------------------------|----------|--------------------|-----------------|-----------------------------|----------|---------------------------------|-----------------|-----------------------------------|----------|---------------------------------------|-----------------|
| pTracer      | 0.04 ± 0.01                 | 20       |                    | 15%             | 0.05 ± 0.01                 | 10       | <i>ns</i>                       | 18%             | 0.06 ± 0.01                       | 6        |                                       | 22%             |
| WT           | 0.27 ± 0.02                 | 14       | -                  | 100%            | 0.52 ± 0.05                 | 10       | 10 <sup>-4</sup>                | 180%            |                                   |          |                                       |                 |
| p.Phe508del  | 0.04 ± 0.01                 | 10       | <10 <sup>-4</sup>  | 15%             | 0.06 ± 0.02                 | 5        | <i>ns</i>                       | 22%             | 0.11 ± 0.02                       | 6        | 10 <sup>-4</sup>                      | 41%             |
| p.Glu60Tyr   | 0.05 ± 0.02                 | 5        | <10 <sup>-4</sup>  | 18%             | 0.03 ± 0.01                 | 2        | <i>ns</i>                       | 11%             | 0.18 ± 0.01                       | 4        | 10 <sup>-5</sup>                      | 67%             |
| p.Tyr122Lys  | 0.14 ± 0.02                 | 6        | 0.002              | 52%             | 0.37 ± 0.04                 | 5        | 10 <sup>-4</sup>                | 137%            |                                   |          |                                       |                 |
| p.Tyr122Gln  | 0.23 ± 0.02                 | 4        | <i>ns</i>          | 85%             | 0.51 ± 0.06                 | 3        | 0.02                            | 190%            |                                   |          |                                       |                 |
| p.Ser434Trp  | 0.22 ± 0.02                 | 4        | <i>ns</i>          | 82%             | 0.45 ± 0.04                 | 3        | 10 <sup>-4</sup>                | 167%            |                                   |          |                                       |                 |
| p.Ser466Trp  | 0.04 ± 0.01                 | 5        | <10 <sup>-4</sup>  | 15%             | 0.04 ± 0.01                 | 2        | <i>ns</i>                       | 15%             | 0.18 ± 0.01                       | 4        | 10 <sup>-6</sup>                      | 67%             |
| p.Gly542Trp  | 0.09 ± 0.02                 | 6        | <10 <sup>-4</sup>  | 33%             | 0.19 ± 0.04                 | 3        | 0.03                            | 70%             | 0.26 ± 0.04                       | 3        | 10 <sup>-3</sup>                      | 96%             |
| p.Gly542Cys  | 0.22 ± 0.02                 | 3        | <i>ns</i>          | 81%             | 0.43 ± 0.04                 | 3        | 10 <sup>-3</sup>                | 160%            |                                   |          |                                       |                 |
| p.Gly542Arg  | 0.26 ± 0.04                 | 4        | <i>ns</i>          | 96%             | 0.45 ± 0.03                 | 3        | 10 <sup>-3</sup>                | 167%            |                                   |          |                                       |                 |
| p.Arg553Trp  | 0.09 ± 0.01                 | 6        | 10 <sup>-4</sup>   | 33%             | 0.17 ± 0.01                 | 3        | 10 <sup>-3</sup>                | 62%             | 0.21 ± 0.01                       | 5        | 10 <sup>-4</sup>                      | 78%             |
| p.Arg785Trp  | 0.34 ± 0.06                 | 6        | <i>ns</i>          | 125%            | 0.57 ± 0.08                 | 3        | 0.02                            | 211%            |                                   |          |                                       |                 |
| p.Tyr1092Gln | 0.15 ± 0.02                 | 6        | 10 <sup>-3</sup>   | 56%             | 0.40 ± 0.06                 | 4        | 0.002                           | 150%            |                                   |          |                                       |                 |
| p.Glu1104Gln | 0.24 ± 0.04                 | 5        | <i>ns</i>          | 89%             | 0.37 ± 0.03                 | 3        | 0.03                            | 140%            |                                   |          |                                       |                 |
| p.Glu1104Tyr | 0.07 ± 0.05                 | 7        | <10 <sup>-4</sup>  | 26%             | 0.12 ± 0.02                 | 3        | 0.04                            | 44%             | 0.19 ± 0.01                       | 5        | 10 <sup>-4</sup>                      | 70%             |
| p.Arg1128Trp | 0.25 ± 0.05                 | 5        | <i>ns</i>          | 92%             | 0.44 ± 0.06                 | 3        | 0.02                            | 160%            |                                   |          |                                       |                 |
| p.Arg1162Trp | 0.29 ± 0.08                 | 3        | <i>ns</i>          | 107%            | 0.45 ± 0.13                 | 3        | 0.02                            | 167%            |                                   |          |                                       |                 |
| p.Ser1196Trp | 0.35 ± 0.03                 | 6        | <i>ns</i>          | 130%            | 0.66 ± 0.09                 | 5        | 10 <sup>-4</sup>                | 244%            |                                   |          |                                       |                 |
| p.Gln1313Tyr | 0.31 ± 0.08                 | 5        | <i>ns</i>          | 115%            | 0.49 ± 0.14                 | 3        | 0.02                            | 180%            |                                   |          |                                       |                 |



**S8 Table. Predicted readthrough response to negamycin.** Skills were assigned for the level of readthrough, the occurrence of exon skipping and the function of the recoded channel to assess treatment response (Low, Moderate, or High). Additional CFTR directed co-therapies are indicated for the considered PTC.

| <b>Mutation</b>                | <b>Readthrough stimulation</b> | <b>Skipping</b> | <b>Function</b> | <b>Response</b> | <b>Additional treatment</b> |
|--------------------------------|--------------------------------|-----------------|-----------------|-----------------|-----------------------------|
| <b>p.Glu60*</b>                | Low                            | Low             | Low             | <b>Low</b>      | Potentiator + Corrector     |
| <b>p.Tyr122*</b>               | Low                            | High            | High            | <b>Low</b>      | Potentiator                 |
| <b>p.Ser434*</b>               | High                           | High            | High            | <b>High</b>     | Potentiator                 |
| <b>p.Ser466*</b>               | High                           | High            | Low             | <b>Low</b>      | Potentiator + Corrector     |
| <b>p.Gly542*</b>               | Low                            | High            | Moderate        | <b>Low</b>      | Potentiator + Corrector     |
| <b>p.Arg553*</b>               | Low                            | Low             | Moderate        | <b>Low</b>      | Potentiator + Corrector     |
| <b>p.Arg785*</b>               | Low                            | Low             | High            | <b>Low</b>      | Potentiator                 |
| <b>p.Trp846*<sub>UGA</sub></b> | High                           | Low             | High            | <b>Low</b>      | Potentiator                 |
| <b>p.Tyr1092*</b>              | Low                            | High            | Moderate        | <b>Low</b>      | Potentiator                 |
| <b>p.Glu1104*</b>              | Low                            | High            | Moderate        | <b>Low</b>      | Potentiator + Corrector     |
| <b>p.Arg1128*</b>              | Moderate                       | High            | High            | <b>Moderate</b> | Potentiator                 |
| <b>p.Arg1162*</b>              | Low                            | High            | High            | <b>Low</b>      | Potentiator                 |
| <b>p.Ser1196*</b>              | Low                            | High            | High            | <b>Low</b>      | Potentiator                 |
| <b>p.Trp1282*</b>              | Low                            | High            | High            | <b>Low</b>      | Potentiator                 |
| <b>p.Gln1313*</b>              | Low                            | High            | High            | <b>Low</b>      | Potentiator                 |

**S9 Table. Mismatches corresponding to amino acid incorporation.** Major and minor amino acids identified by mass spectrometry are indicated in bold and in italic, respectively.

| PTC | Mismatch position 1 | Mismatch position 2 | Mismatch position 3 |
|-----|---------------------|---------------------|---------------------|
| UAA | <b>CAA (Gln)</b>    | UUA (Leu)           | <b>UAU (Tyr)</b>    |
|     | <i>AAA (Lys)</i>    | UCA (Ser)           | <b>UAC (Tyr)</b>    |
|     | GAA (Glu)           | UGA (Stop)          | UAG (Stop)          |
| UAG | <b>CAG (Gln)</b>    | UUG (Leu)           | <b>UAU (Tyr)</b>    |
|     | <i>AAG (Lys)</i>    | UCG (Ser)           | <b>UAC (Tyr)</b>    |
|     | GAG (Glu)           | UGG (Trp)           | UAA (Stop)          |
| UGA | <b>CGA (Arg)</b>    | UUA (Leu)           | <b>UGU (Cys)</b>    |
|     | <i>AGA (Arg)</i>    | ACA (Thr)           | <b>UGC (Cys)</b>    |
|     | GGA (Gly)           | UAA (Stop)          | <b>UGG (Trp)</b>    |

**S10 Table. Primer sequences used to generate the corresponding minigene constructs.** Are indicated both Forward (F) and Reverse primers (R) and the restriction enzyme used for cloning.

| Name     | Primer sequence                   | Restriction enzyme used for cloning |
|----------|-----------------------------------|-------------------------------------|
| Exon10_F | ccgctcgagtgggtaattcagggtgctt      | <i>XhoI</i>                         |
| Exon10_R | cgcggatccagcagctgggactacagcat     | <i>BamHI</i>                        |
| Exon12_F | ccgctcgagtttgtaaaatggacctatggatga | <i>XhoI</i>                         |
| Exon12_R | cgcggatccagtggcagggctctatgatgg    | <i>BamHI</i>                        |
| Exon20_F | ccgctcgagtgcctctggcttgacctat      | <i>XhoI</i>                         |
| Exon20_R | cgcggatcccatttctcaacctggcgatt     | <i>BamHI</i>                        |
| Exon22_F | ccgctcgagttgtgcagtgcctcatag       | <i>XhoI</i>                         |
| Exon22_R | cgcggatcctcactgtttggcagaatgg      | <i>BamHI</i>                        |
| Exon24_F | ccgctcgagcaactaggaattgttctaacagg  | <i>XhoI</i>                         |
| Exon24_R | gcgctctagaccagtgaggagagaagtaggc   | <i>XbaI</i>                         |

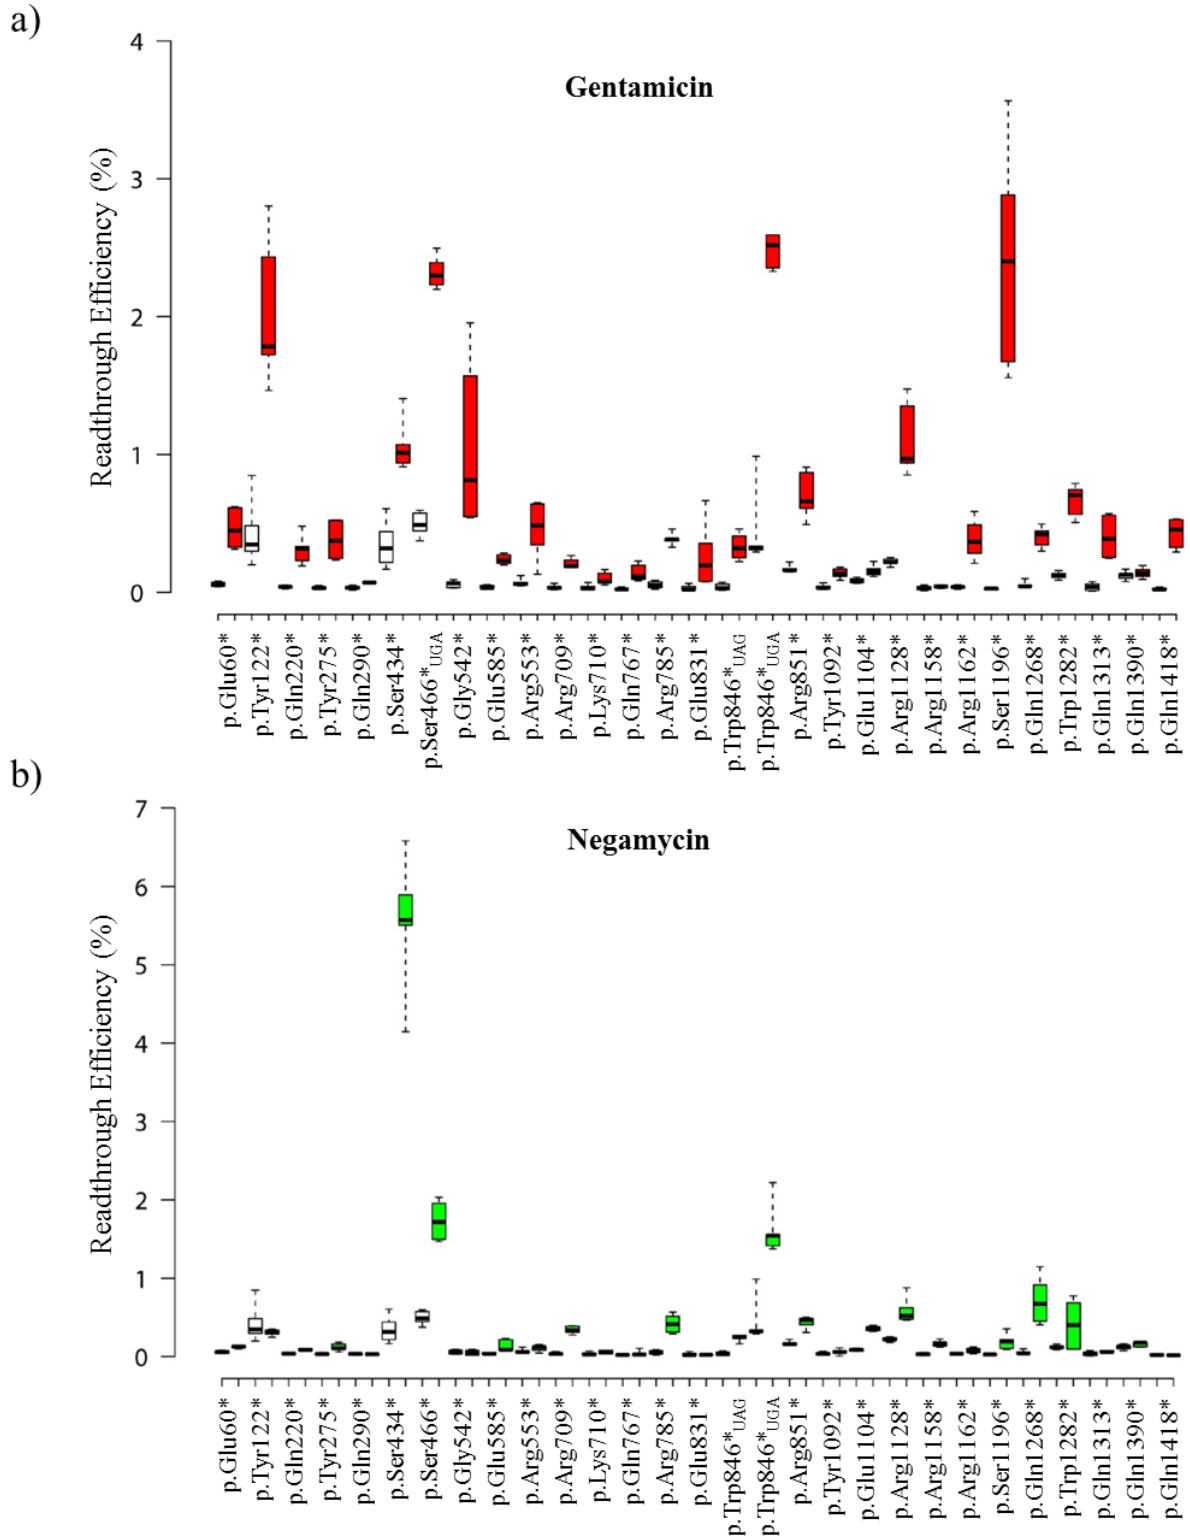

**S1 Figure. Readthrough levels.** Readthrough levels measured for the indicated CFTR PTC mutation, at basal state (empty boxes) and after incubation with gentamicin (a) (red boxes) or negamycin (b) (green boxes). Center lines show the medians; box limits indicate the 25th and 75th percentiles as determined by R software; whiskers extend 1.5 times the interquartile range from the 25th and 75th percentiles  $n > 5$  for all samples.

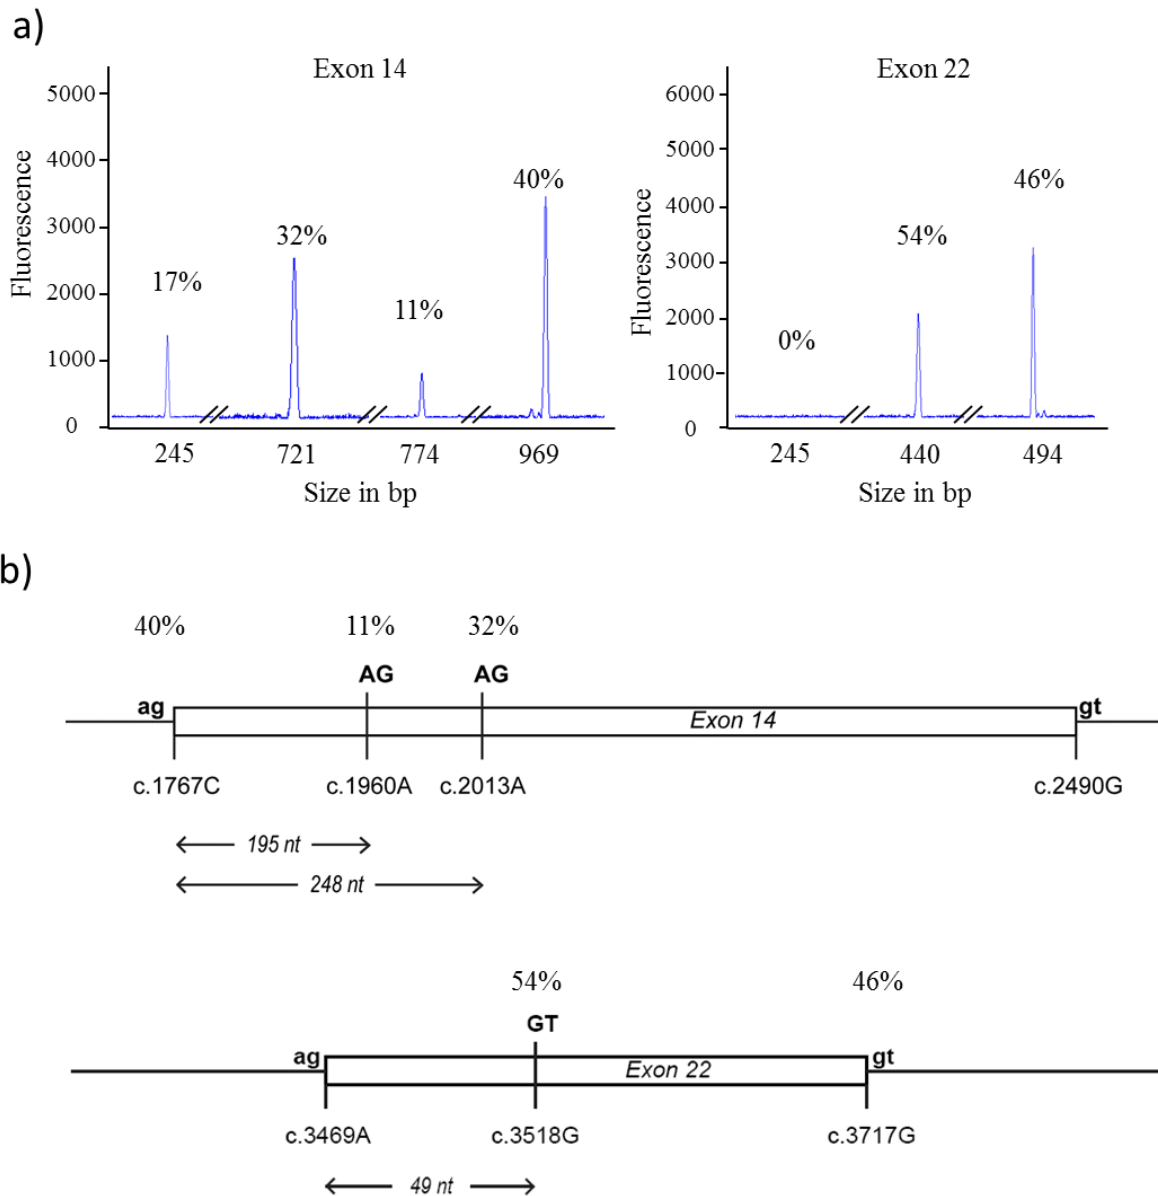

**S2 Figure. Multiple transcripts produced with the constructs carrying CFTR exon 14 and exon 22.** A. Examples of capillary electrophoresis analysis of RT-PCR products obtained from BEAS-2B cells transfected with indicated minigene. The corresponding size and relative amount for each peak is indicated. The peak at 245 bp corresponds to transcripts lacking the exon. B. Schematic representation of CFTR exons 14 and 22 indicating the position of the identified cryptic acceptor and donor sites. The amounts of corresponding transcripts are indicated in %.

Spectrum from Ion1\_TAA\_H20115\_H2\_will (sample: 1) - Ion1, Experiment 6, <FOE MS?> (200 - 1600) from 36.148 min  
 Precursor: 959.2 Da  
 With 8 other unassigned peaks

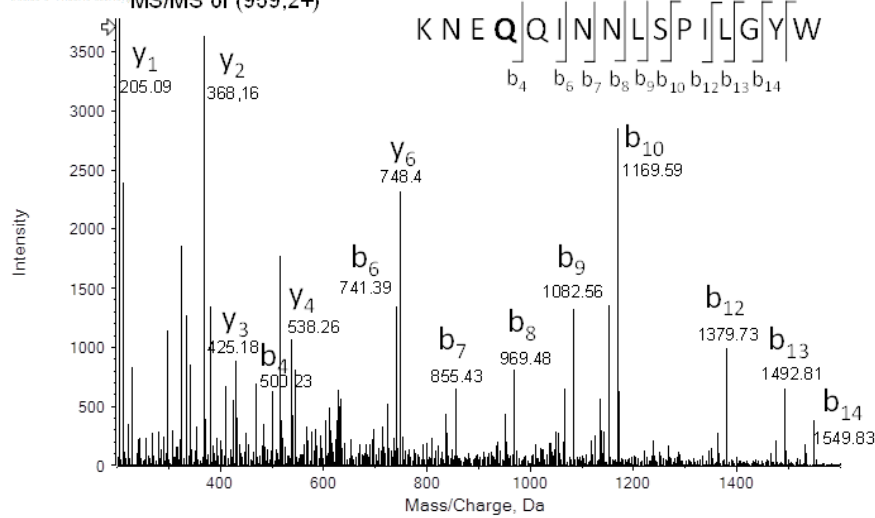

Spectrum from Ion1\_TAA\_H20115\_H2\_will (sample: 1) - Ion1, Experiment 6, <FOE MS?> (200 - 1600) from 38.525 min  
 Precursor: 976.5 Da  
 With 8 other unassigned peaks

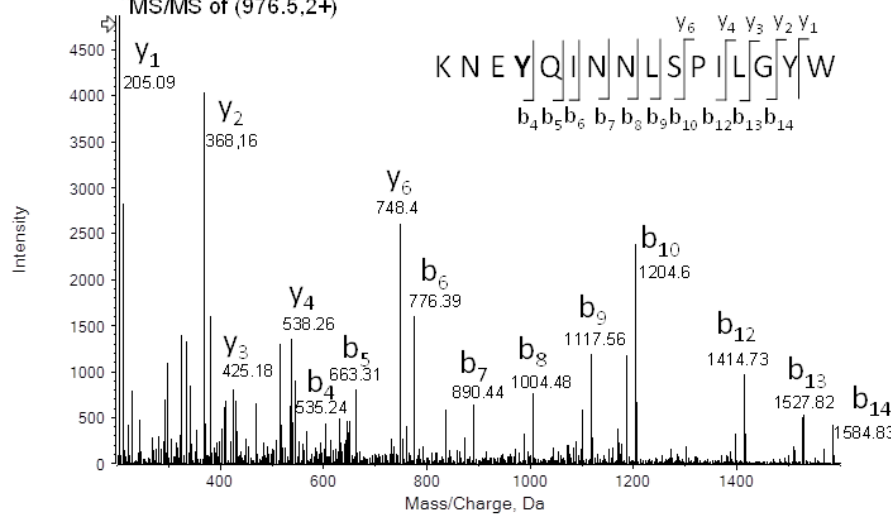

Spectrum from Ion1\_TAA\_H20115\_H2\_will (sample: 1) - Ion1, Experiment 6, <FOE MS?> (200 - 1600) from 39.457 min  
 Precursor: 773.4 Da  
 With 2 other unassigned peaks

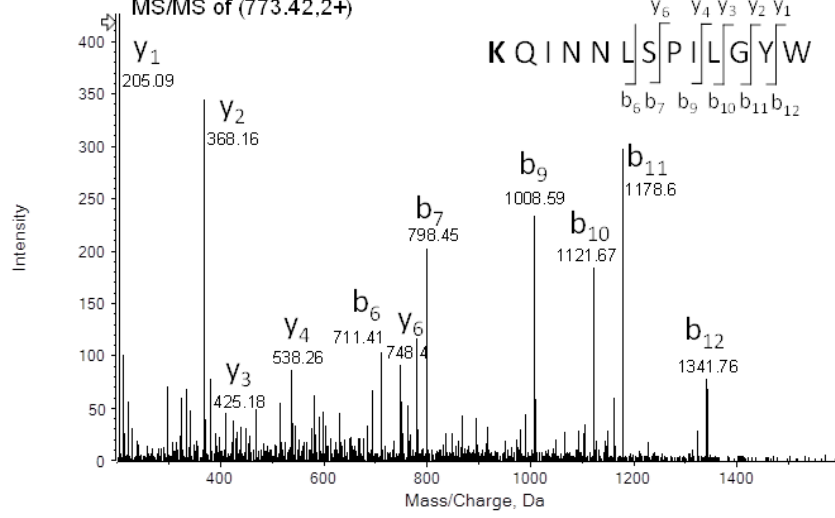

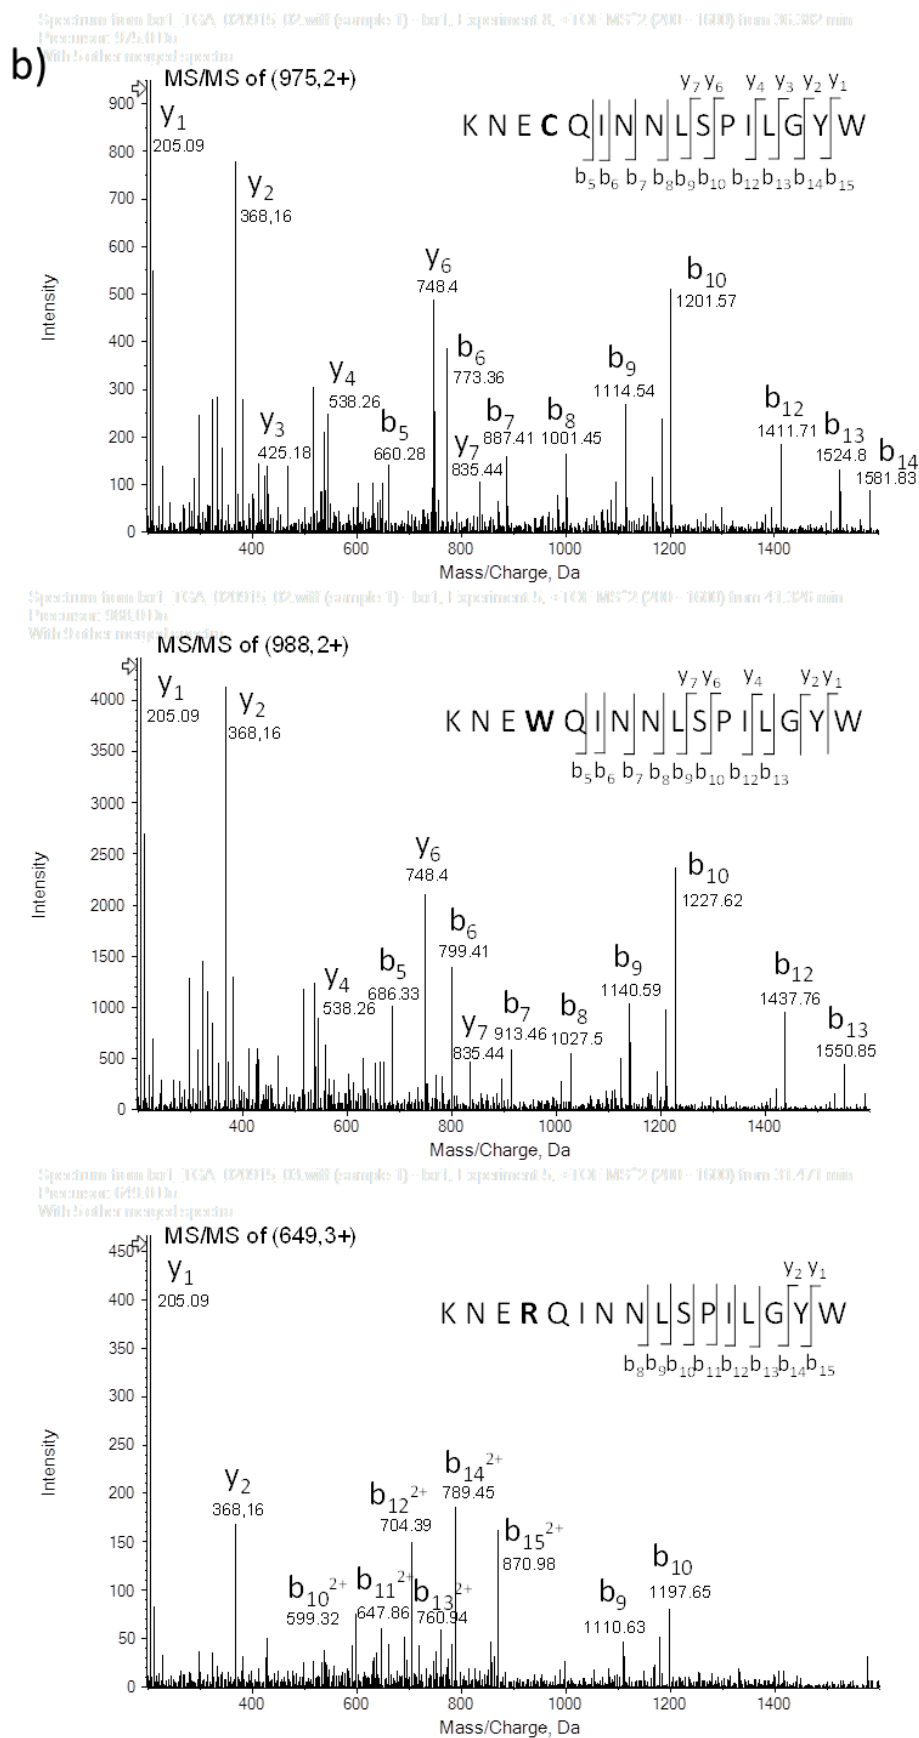

**S3 Figure. MS/MS spectra of the readthrough peptides in presence of paromomycin.** Panels show representative Triple-TOF MS/MS spectra for readthrough peptides, for the UAA/UAG (A) and UGA stop codons (B). No new amino acid is inserted in presence of

paromomycin (Q, Y, K for UAA/UAG and C, W, R for UGA). The identified fragments are annotated on the sequence and the Mascot ion scores (not shown) of readthrough peptides are significantly higher than the identity thresholds calculated at a FDR of 1%. One letter amino acid code was used for better visibility.



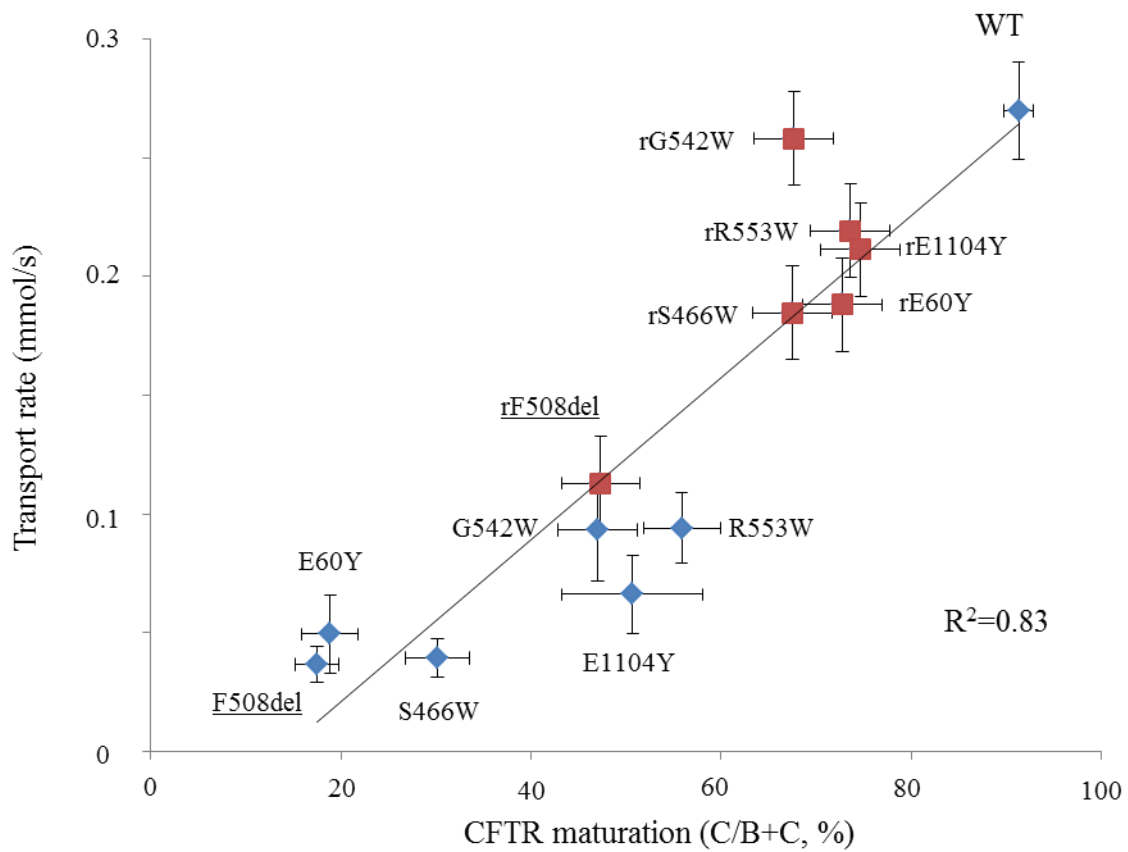

**S4 Figure. Correlation between CFTR maturation and function.** Plot of the maturation ratio vs channel function for the indicated mutation under basal conditions (bleu dots) and after VX809/VX770 treatment (red). Treated channels are indicated as rescued (r- before the name). One letter nomenclature was used for amino acids.

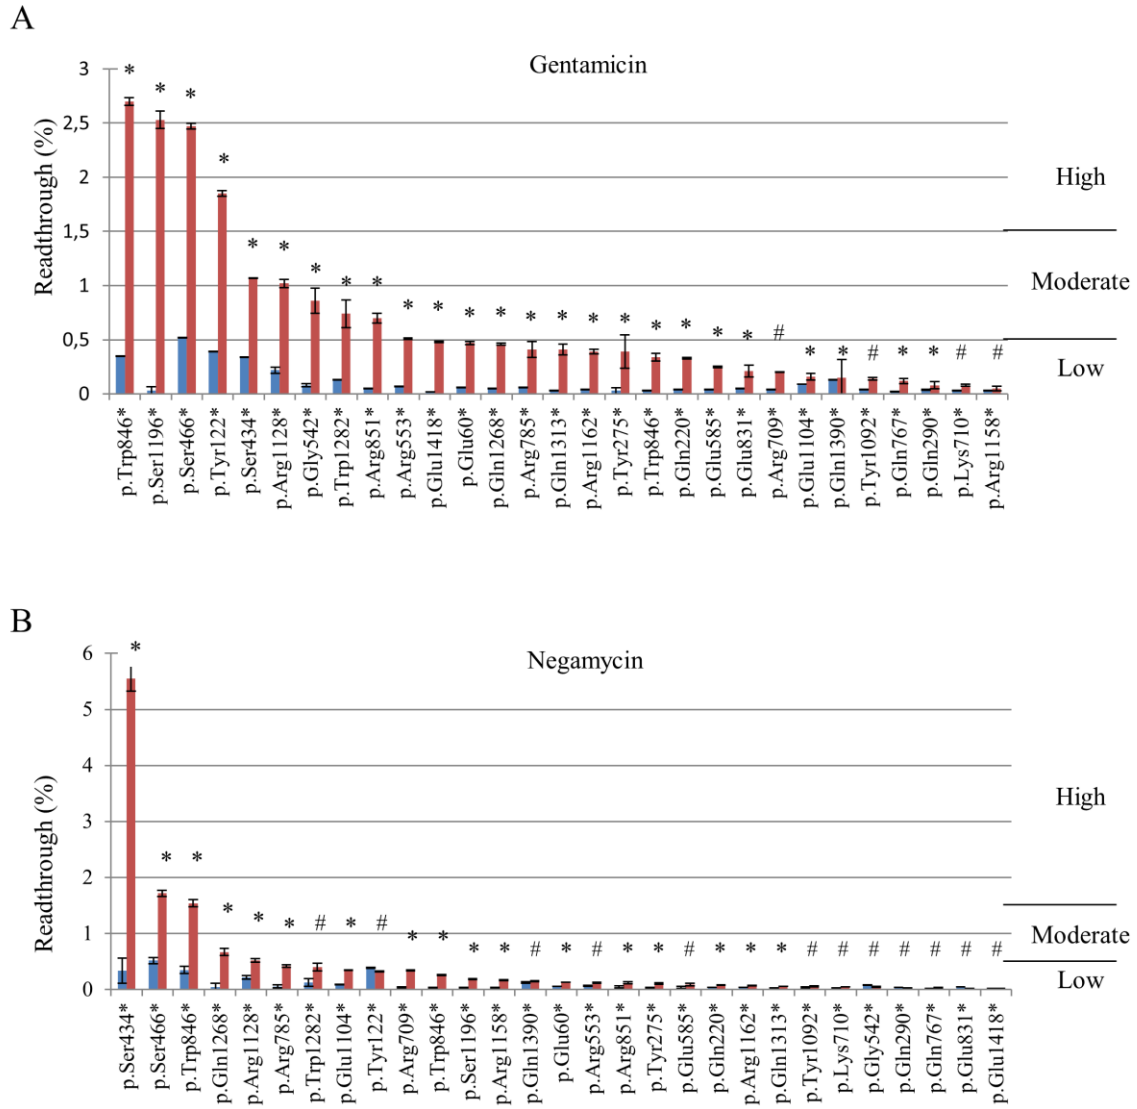

**S5 Figure. Classified readthrough response to gentamicin and negamycin.** Are indicated the levels of response considered as Low, Moderate and High.
